# Supplementary material for: Circularized Nanodiscs for Multivalent Mosaic Display of SARS-CoV-2 Spike Protein Antigens
Source: MDPI journal article supplement (doi:10.3390/vaccines11111655), 2023-10-28
Supplement: s1 [file s1]

# Circularized Nanodiscs for Multivalent Mosaic Display of SARS-CoV-2

## Spike Protein Antigens

Moustafa T. Mabrouk <sup>1,2</sup>, Asmaa A. Zidan <sup>3</sup>, Nihal Aly <sup>1</sup>, Mostafa T. Mohammed <sup>1,4</sup>, Fadi Ghantous <sup>5</sup>, Michael S. Seaman <sup>5</sup>, Jonathan F. Lovell <sup>2</sup> and Mahmoud L. Nasr <sup>1,6,\*</sup>

### Affiliations:

Division of Engineering in Medicine and Division of Renal Medicine, Department of Medicine, Brigham and Women's Hospital, Harvard Medical School, Boston, MA 02115, USA; mmabrouk@buffalo.edu (M.T.M.)

<sup>2</sup> Department of Biomedical Engineering, University at Buffalo, State University of New York, Buffalo, NY 14260, USA; jflorell@buffalo.edu

<sup>3</sup> Schepens Eye Research Institute of Massachusetts Eye and Ear, Department of Ophthalmology, Harvard Medical School, Boston, MA 02114 USA

<sup>4</sup> Clinical Pathology Department, Minia University, Minia, Egypt

<sup>5</sup> Center for Virology and Vaccine Research, Beth Israel Deaconess Medical Center, Boston, MA 02115, USA

<sup>6</sup> Broad Institute of MIT and Harvard, Cambridge, MA 02142, USA

\* Correspondence: mnasr@bwh.harvard.edu

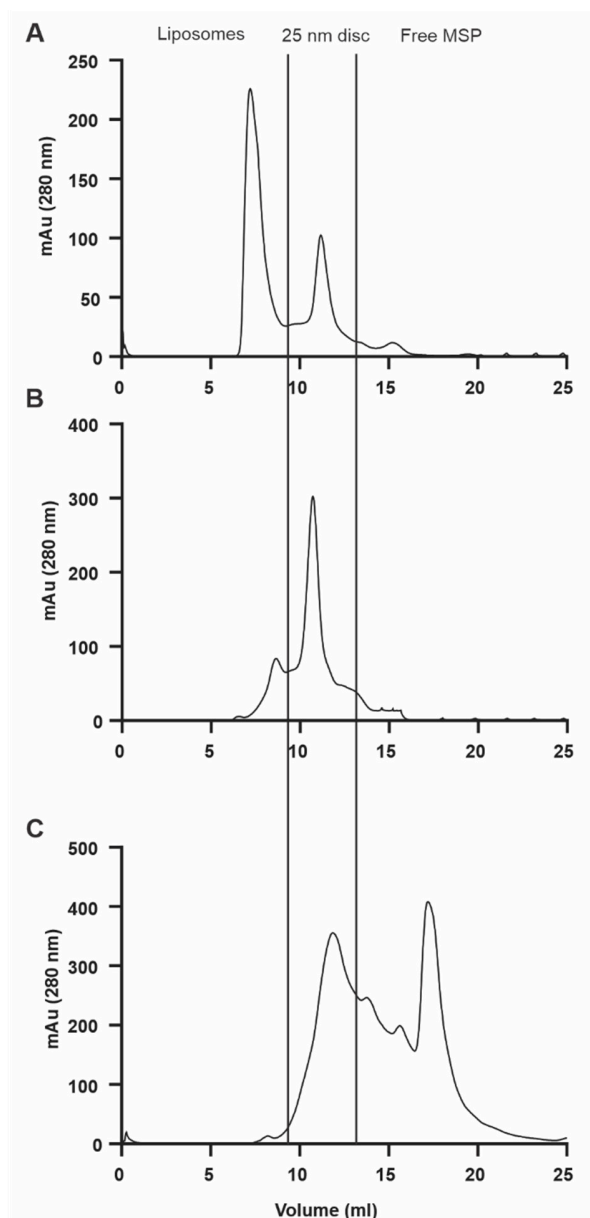

**Figure S1. Effect of lipid: cNW50 molar ratio on formation of 25 nm nanodisc.** SEC profiles using Superpose 10/160 column. A) 4000:1 lipid :cNW50 shows predominantly liposomes/aggregation formation (EM photo showing Liposomes fraction, scale bar =200 nm). B) 2000:1 Lipid:cNW50 showed formation of predominantly 25 nm nanodisc. C) 1000:1 Lipid: cNW50 shows a peak for lipid free cNW50 (right) in addition to 25 nm nanodisc peak.

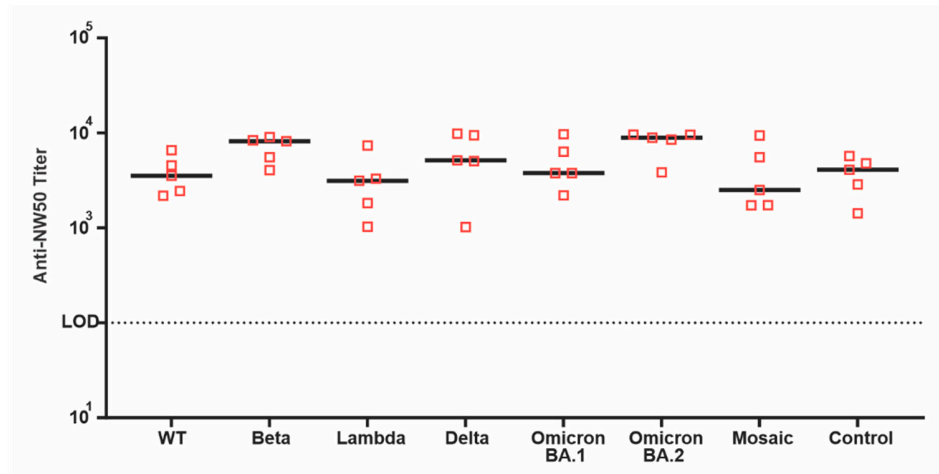

**Figure S2. Anti NW50 IgG titer measured by ELISA.** 1  $\mu\text{g mL}^{-1}$  of NW50 protein diluted in coating buffer (28.5 mM  $\text{Na}_2\text{CO}_3$ ; 71.4 mM  $\text{NaHCO}_3$ , pH 9.6) was used to coat 96-well plates for 2 hr at 37 °C. Wells were washed and then blocked with 2% BSA in PBS containing 0.1% Tween-20 (PBS-T) for 2 hr at 37 °C. Mouse sera (serially diluted 10 folds in PBS-T containing 1% BSA) were incubated in the wells for 1 hr at 37 °C, then washed with PBS-T. Goat anti-mouse IgG-HRP was added. Wells were washed again with PBS-T before adding tetramethylbenzidine (TMB) solution. Antibody titers were defined as the reciprocal serum dilution at which the absorbance at 450 nm exceeded background by greater than 0.5 absorbance units.

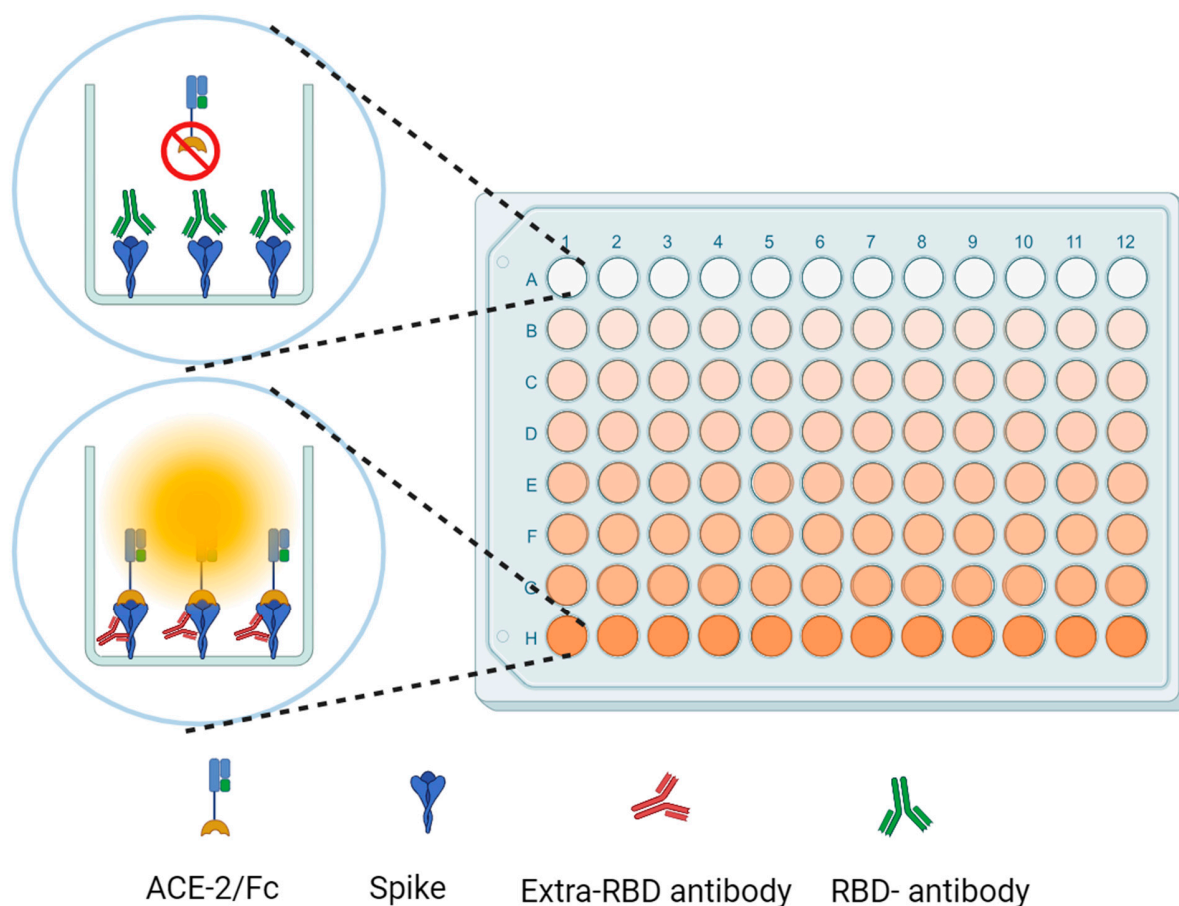

**Figure S3. A schematic figure showing Spike/RBD-hACE2 Inhibition Assay:** SARS-CoV-2 spike proteins was used to coat 96 well plates with 0.5 $\mu$ g/ml at 4 °C overnight and blocked with 2% BSA for 2 hours at 37 °C. The plate was used to check if post immune sera could block the interaction between hACE2-Fc and the coated spike protein.
